# Supplementary material for: Transposon accumulation at xenobiotic gene family loci: a comparative genomic analysis in aphids
Source: bioRxiv preprint, doi:10.1101/2023.02.20.529256, version 3 (2023-08-29)
Supplement: Sup_Table_S4 [file 529256_file21.xlsx]

## Sheet: Sheet1
Supplemental Table S4. Germline expression for XGF and housekeeping genes in A. pisum from (Jaquiéry et al. 2022)
Type	PeaAphid_LocusID	Gene	Sample_Replicate	RPKM	Gene Class	geneClass
Esterase	LOC100159239	esterase E4	M_gon1	4.09215	XGF
Esterase	LOC100159839	esterase E4	M_gon1	11.3546	XGF
Esterase	LOC100160638	esterase FE4	M_gon1	13.2054	XGF
Esterase	LOC100161016	esterase D/formylglutathione hydrolase-like	M_gon1	16.0221	XGF
Esterase	LOC100161742	feruloyl esterase B-like	M_gon1	401.777	XGF
Esterase	LOC100161878	esterase FE4	M_gon1	12.7893	XGF
Esterase	LOC100161942	esterase D/formylglutathione hydrolase-like	M_gon1	23.3653	XGF
Esterase	LOC100162163	esterase E4-like	M_gon1	107.736	XGF
Esterase	LOC100163178	esterase ybfF-like	M_gon1	9.65368	XGF
Esterase	LOC100163252	esterase FE4	M_gon1	2.04727	XGF
Esterase	LOC100163376	venom carboxylesterase-6	M_gon1	47.5656	XGF
Esterase	LOC100164908	esterase FE4	M_gon1	NA	XGF
Esterase	LOC100165147	esterase FE4-like	M_gon1	2.4207	XGF
Esterase	LOC100165600	esterase FE4-like	M_gon1	0	XGF
Esterase	LOC100166921	esterase FE4	M_gon1	0	XGF
Esterase	LOC100167502	esterase FE4-like	M_gon1	0	XGF
Esterase	LOC100168312	esterase FE4-like	M_gon1	17.8283	XGF
Esterase	LOC100168479	esterase E4	M_gon1	38.2276	XGF
Esterase	LOC100168834	esterase E4	M_gon1	405.895	XGF
Esterase	LOC100168842	neuropathy target esterase sws	M_gon1	20.9488	XGF
Esterase	LOC100169534	esterase FE4-like	M_gon1	NA	XGF
Esterase	LOC100569852	esterase E4	M_gon1	24.7873	XGF
Esterase	LOC100570344	esterase E4	M_gon1	11.9481	XGF
Esterase	LOC100571158	esterase FE4	M_gon1	18.1905	XGF
Esterase	LOC103308679	esterase E4	M_gon1	0	XGF
Esterase	LOC103310504	esterase FE4-like	M_gon1	NA	XGF
Esterase	LOC103311606	esterase FE4-like	M_gon1	5.7734	XGF
Esterase	LOC107885829	esterase FE4-like	M_gon1	1.17956	XGF
Esterase	LOC115033729	esterase SG1-like	M_gon1	NA	XGF
Cyctochrome P450	LOC100159215	cytochrome P450 4C1-like	M_gon1	3.51113	XGF
Cyctochrome P450	LOC100159226	probable cytochrome P450 6a13	M_gon1	6.02473	XGF
Cyctochrome P450	LOC100159248	cytochrome P450 protein	M_gon1	7.02105	XGF
Cyctochrome P450	LOC100159333	cytochrome P450 307a1-like	M_gon1	0.0208625	XGF
Cyctochrome P450	LOC100159387	probable cytochrome P450 6a13	M_gon1	2.84765	XGF
Cyctochrome P450	LOC100159506	cytochrome P450 4C1	M_gon1	0.446746	XGF
Cyctochrome P450	LOC100159616	cytochrome P450 315a1, mitochondrial	M_gon1	5.95044	XGF
Cyctochrome P450	LOC100160204	cytochrome P450 307a1-like	M_gon1	0.0401201	XGF
Cyctochrome P450	LOC100160629	cytochrome P450 4C1	M_gon1	61.2582	XGF
Cyctochrome P450	LOC100160738	cytochrome P450 307a1-like	M_gon1	NA	XGF
Cyctochrome P450	LOC100160808	cytochrome P450 4g15-like	M_gon1	3.03875	XGF
Cyctochrome P450	LOC100160895	cytochrome P450 6a2	M_gon1	35.3402	XGF
Cyctochrome P450	LOC100161319	cytochrome P450 4C1	M_gon1	2.46011	XGF
Cyctochrome P450	LOC100161405	cytochrome P450 4C1	M_gon1	36.2213	XGF
Cyctochrome P450	LOC100161480	probable cytochrome P450 6a13	M_gon1	0.0226199	XGF
Cyctochrome P450	LOC100161627	probable cytochrome P450 6a14	M_gon1	0.420632	XGF
Cyctochrome P450	LOC100161793	probable cytochrome P450 49a1	M_gon1	0.602694	XGF
Cyctochrome P450	LOC100161881	probable cytochrome P450 49a1	M_gon1	4.18523	XGF
Cyctochrome P450	LOC100162056	cytochrome P450 6k1	M_gon1	19.0026	XGF
Cyctochrome P450	LOC100162179	cytochrome P450 4C1	M_gon1	2.1605	XGF
Cyctochrome P450	LOC100162206	probable cytochrome P450 303a1	M_gon1	0.313929	XGF
Cyctochrome P450	LOC100162372	cytochrome P450 6k1	M_gon1	10.0005	XGF
Cyctochrome P450	LOC100162594	probable cytochrome P450 6a14	M_gon1	9.81725	XGF
Cyctochrome P450	LOC100162836	cytochrome P450 4C1-like	M_gon1	2.20069	XGF
Cyctochrome P450	LOC100162873	cytochrome b561	M_gon1	4.00383	XGF
Cyctochrome P450	LOC100163195	probable cytochrome P450 6a13	M_gon1	3.8868	XGF
Cyctochrome P450	LOC100163313	probable cytochrome P450 6a13	M_gon1	2.19695	XGF
Cyctochrome P450	LOC100163366	cytochrome P450 4C1-like	M_gon1	NA	XGF
Cyctochrome P450	LOC100163652	cytochrome P450 18a1	M_gon1	25.7079	XGF
Cyctochrome P450	LOC100163900	cytochrome P450 6k1	M_gon1	9.47459	XGF
Cyctochrome P450	LOC100164042	probable cytochrome P450 6a13	M_gon1	38.0928	XGF
Cyctochrome P450	LOC100164072	cytochrome P450 4g15	M_gon1	187.39	XGF
Cyctochrome P450	LOC100164459	cytochrome P450 6k1	M_gon1	7.29788	XGF
Cyctochrome P450	LOC100164600	probable cytochrome P450 301a1, mitochondrial	M_gon1	1.66509	XGF
Cyctochrome P450	LOC100164743	cytochrome P450 4V2	M_gon1	8.19688	XGF
Cyctochrome P450	LOC100164959	cytochrome b561	M_gon1	4.76118	XGF
Cyctochrome P450	LOC100165004	cytochrome P450 4C1-like	M_gon1	5.3799	XGF
Cyctochrome P450	LOC100165148	cytochrome P450 4g15	M_gon1	NA	XGF
Cyctochrome P450	LOC100165240	probable cytochrome P450 6a13	M_gon1	2.59505	XGF
Cyctochrome P450	LOC100165691	cytochrome P450 306a1	M_gon1	1.82454	XGF
Cyctochrome P450	LOC100165806	cytochrome P450 302a1, mitochondrial	M_gon1	2.14691	XGF
Cyctochrome P450	LOC100165972	probable cytochrome P450 6a13	M_gon1	17.3865	XGF
Cyctochrome P450	LOC100166635	cytochrome P450 4C1-like	M_gon1	NA	XGF
Cyctochrome P450	LOC100166760	cytochrome P450 4C1	M_gon1	2.39136	XGF
Cyctochrome P450	LOC100167018	cytochrome P450 4g15-like	M_gon1	NA	XGF
Cyctochrome P450	LOC100167264	probable cytochrome P450 6a13	M_gon1	3.84931	XGF
Cyctochrome P450	LOC100167486	cytochrome P450 4C1-like	M_gon1	0.537748	XGF
Cyctochrome P450	LOC100167598	cytochrome c1-like	M_gon1	85.0345	XGF
Cyctochrome P450	LOC100167777	cytochrome P450 4C1	M_gon1	0.192122	XGF
Cyctochrome P450	LOC100167889	cytochrome P450 4C1	M_gon1	25.9714	XGF
Cyctochrome P450	LOC100168007	probable cytochrome P450 6a13	M_gon1	0.227312	XGF
Cyctochrome P450	LOC100168115	cytochrome P450 6a13-like	M_gon1	1.5526	XGF
Cyctochrome P450	LOC100168315	cytochrome P450 4C1	M_gon1	0.272347	XGF
Cyctochrome P450	LOC100168939	probable cytochrome P450 305a1	M_gon1	3.51138	XGF
Cyctochrome P450	LOC100169288	cytochrome b561-like	M_gon1	0.311994	XGF
Cyctochrome P450	LOC100569567	cytochrome P450 6B1	M_gon1	4.3356	XGF
Cyctochrome P450	LOC100570955	cytochrome P450 4C1-like	M_gon1	0.737865	XGF
Cyctochrome P450	LOC100571473	cytochrome P450 302a1, mitochondrial-like	M_gon1	0.697147	XGF
Cyctochrome P450	LOC100571769	cytochrome P450 302a1, mitochondrial-like	M_gon1	NA	XGF
Cyctochrome P450	LOC100571859	cytochrome P450 6d3	M_gon1	2.54807	XGF
Cyctochrome P450	LOC100572007	cytochrome P450 6k1	M_gon1	5.30269	XGF
Cyctochrome P450	LOC100573593	cytochrome P450 4C1	M_gon1	2.83921	XGF
Cyctochrome P450	LOC100574207	cytochrome P450 4c3-like	M_gon1	NA	XGF
Cyctochrome P450	LOC100574719	probable cytochrome P450 6a14	M_gon1	3.85257	XGF
Cyctochrome P450	LOC100574848	cytochrome P450 6j1	M_gon1	0.0303539	XGF
Cyctochrome P450	LOC100574879	cytochrome P450 6k1	M_gon1	0.638146	XGF
Cyctochrome P450	LOC100575859	cytochrome P450 4C1-like	M_gon1	2.80396	XGF
Cyctochrome P450	LOC103309082	cytochrome P450 4C1-like	M_gon1	NA	XGF
Cyctochrome P450	LOC103310019	probable cytochrome P450 6a14	M_gon1	NA	XGF
Cyctochrome P450	LOC103310376	cytochrome P450 4C1-like	M_gon1	NA	XGF
Cyctochrome P450	LOC103311596	probable cytochrome P450 6a13	M_gon1	NA	XGF
Cyctochrome P450	LOC107882215	cytochrome P450 6B1-like	M_gon1	NA	XGF
Cyctochrome P450	LOC107883849	cytochrome P450 4C1-like	M_gon1	0.0601802	XGF
Cyctochrome P450	LOC112935894	cytochrome P450 4g15-like	M_gon1	NA	XGF
Cyctochrome P450	LOC115033844	probable cytochrome P450 6a13	M_gon1	NA	XGF
Cyctochrome P450	LOC115034160	cytochrome P450 4d1-like	M_gon1	NA	XGF
ABC Transporter	LOC100159508	ABC transporter G family member 23	M_gon1	0.722086	XGF
ABC Transporter	LOC100165044	ABC transporter G family member 23-like	M_gon1	NA	XGF
ABC Transporter	LOC100165247	ABC transporter G family member 20	M_gon1	44.6765	XGF
ABC Transporter	LOC100165394	ABC transporter G family member 23	M_gon1	95.1152	XGF
ABC Transporter	LOC100165869	ABC transporter G family member 23	M_gon1	21.6044	XGF
ABC Transporter	LOC100166121	ABC transporter G family member 9	M_gon1	29.6451	XGF
ABC Transporter	LOC100166151	ABC transporter G family member 23	M_gon1	10.08	XGF
ABC Transporter	LOC100167984	ABC transporter G family member 23	M_gon1	36.1556	XGF
ABC Transporter	LOC100569509	ABC transporter G family member 23	M_gon1	11.9244	XGF
ABC Transporter	LOC100569709	ABC transporter F family member 4-like	M_gon1	0	XGF
ABC Transporter	LOC100569882	ABC transporter G family member 23-like	M_gon1	17.6521	XGF
ABC Transporter	LOC100569981	ABC transporter G family member 23-like	M_gon1	0.312894	XGF
ABC Transporter	LOC100570076	ABC transporter G family member 23-like	M_gon1	0.639191	XGF
ABC Transporter	LOC100570379	ABC transporter G family member 23	M_gon1	0.064961	XGF
ABC Transporter	LOC100571600	ABC transporter G family member 20	M_gon1	7.28305	XGF
ABC Transporter	LOC100574876	ABC transporter F family member 4	M_gon1	5.52185	XGF
ABC Transporter	LOC100575686	ABC transporter G family member 23-like	M_gon1	12.1271	XGF
ABC Transporter	LOC103307655	ABC transporter G family member 23	M_gon1	0.678596	XGF
ABC Transporter	LOC103310851	ABC transporter G family member 23-like	M_gon1	7.8558	XGF
Glutathione S-Transferase	Gstcd	glutathione S-transferase, C-terminal domain containing	M_gon1	NA	XGF
Glutathione S-Transferase	LOC100159421	glutathione S-transferase-like	M_gon1	0.455819	XGF
Glutathione S-Transferase	LOC100159718	glutathione S-transferase 1-1-like	M_gon1	0.175969	XGF
Glutathione S-Transferase	LOC100160859	glutathione S-transferase-like	M_gon1	22.7502	XGF
Glutathione S-Transferase	LOC100161459	glutathione S-transferase-like	M_gon1	51.0732	XGF
Glutathione S-Transferase	LOC100164626	glutathione S-transferase 1-1-like	M_gon1	10.2992	XGF
Glutathione S-Transferase	LOC100165764	microsomal glutathione S-transferase 1-like	M_gon1	0.333184	XGF
Glutathione S-Transferase	LOC100166353	glutathione S-transferase theta-1-like	M_gon1	NA	XGF
Glutathione S-Transferase	LOC100167548	glutathione S-transferase omega-1-like	M_gon1	102.613	XGF
Glutathione S-Transferase	LOC100167788	glutathione S-transferase 1-1-like	M_gon1	NA	XGF
Glutathione S-Transferase	LOC100167906	glutathione S-transferase	M_gon1	734.121	XGF
Glutathione S-Transferase	LOC100168419	glutathione S-transferase, theta class-like	M_gon1	10.0377	XGF
Glutathione S-Transferase	LOC100168850	glutathione S-transferase-like	M_gon1	701.993	XGF
UDP-Glucoronosyltransferase	LOC100158795	UDP-glucuronosyltransferase 2B2-like	M_gon1	NA	XGF
UDP-Glucoronosyltransferase	LOC100159463	UDP-glucuronosyltransferase 2B28	M_gon1	0.278881	XGF
UDP-Glucoronosyltransferase	LOC100159558	UDP-glucuronosyltransferase 2B2-like	M_gon1	0.13581	XGF
UDP-Glucoronosyltransferase	LOC100159580	UDP-glucuronosyltransferase 2C1	M_gon1	9.95675	XGF
UDP-Glucoronosyltransferase	LOC100159691	UDP-glucuronosyltransferase 1-7C	M_gon1	5.95497	XGF
UDP-Glucoronosyltransferase	LOC100160202	UDP-glucuronosyltransferase 2B37	M_gon1	1.29526	XGF
UDP-Glucoronosyltransferase	LOC100160276	UDP-glucuronosyltransferase 2B17	M_gon1	22.5105	XGF
UDP-Glucoronosyltransferase	LOC100160324	UDP-glucuronosyltransferase 2C1-like	M_gon1	11.9474	XGF
UDP-Glucoronosyltransferase	LOC100160380	UDP-glucuronosyltransferase 2B10	M_gon1	93.805	XGF
UDP-Glucoronosyltransferase	LOC100160634	UDP-glucuronosyltransferase 2C1	M_gon1	0.0784984	XGF
UDP-Glucoronosyltransferase	LOC100160721	UDP-glucuronosyltransferase 2C1	M_gon1	3.09787	XGF
UDP-Glucoronosyltransferase	LOC100160783	UDP-glucuronosyltransferase 2C1	M_gon1	4.72869	XGF
UDP-Glucoronosyltransferase	LOC100160886	UDP-glucuronosyltransferase 2B1	M_gon1	0.457877	XGF
UDP-Glucoronosyltransferase	LOC100161224	UDP-glucuronosyltransferase 2A1	M_gon1	9.7613	XGF
UDP-Glucoronosyltransferase	LOC100161606	UDP-glucuronosyltransferase 2B15	M_gon1	0.399051	XGF
UDP-Glucoronosyltransferase	LOC100161618	UDP-glucuronosyltransferase 2C1	M_gon1	0.0807179	XGF
Housekeeping Genes	LOC100166540	succinate dehydrogenase [ubiquinone] flavoprotein subunit	M_gon1	81.4907	HKG
Housekeeping Genes	LOC100574365	elongation factor 1-alpha	M_gon1	1640.03	HKG
Housekeeping Genes	LOC100161360	ATP-dependent RNA helicase me31b	M_gon1	58.1061	HKG
Housekeeping Genes	LOC100169122	glyceraldehyde-3-phosphate dehydrogenase	M_gon1	593.488	HKG
Housekeeping Genes	LOC100159410	40S ribosomal protein S9	M_gon1	292.711	HKG
Housekeeping Genes	LOC100160330	TATA-box-binding protein	M_gon1	13.1446	HKG
Housekeeping Genes	Ube2g1	ubiquitin-conjugating enzyme E2G 1	M_gon1	60.6757	HKG
Housekeeping Genes	Sdhb	succinate dehydrogenase B	M_gon1	171.975	HKG
Housekeeping Genes	LOC100145822	actin	M_gon1	2286.18	HKG
Housekeeping Genes	LOC100162480	60S ribosomal protein L13a	M_gon1	516.569	HKG
Housekeeping Genes	Rps18	ribosomal protein S18	M_gon1	505.513	HKG
Housekeeping Genes	Rpl27	ribosomal protein L27	M_gon1	352.531	HKG
Housekeeping Genes	Tub1	tubulin beta-1	M_gon1	920.53	HKG
Housekeeping Genes	LOC100166732	arginine kinase	M_gon1	345.061	HKG
Housekeeping Genes	LOC100159449	40S ribosomal protein S23-like	M_gon1	583.568	HKG
Housekeeping Genes	LOC100163690	ribosomal protein L11-like	M_gon1	184.379	HKG
Housekeeping Genes	Rpl14	ribosomal protein L14	M_gon1	528.609	HKG
Housekeeping Genes	LOC100160266	40S ribosomal protein S8	M_gon1	268.695	HKG
Housekeeping Genes	Vha36	vacuolar ATPase subunit D	M_gon1	156.243	HKG
Housekeeping Genes	LOC100163455	heat shock 70 kDa protein 4	M_gon1	46.8411	HKG
Housekeeping Genes	ND1	NADH dehydrogenase subunit 1	M_gon1	NA	HKG
Housekeeping Genes	LOC100167446	60S ribosomal protein L8-like	M_gon1	477.811	HKG
Housekeeping Genes	LOC100167366	60S ribosomal protein L4	M_gon1	341.367	HKG
Housekeeping Genes	LOC100167145	heat shock protein 68-like	M_gon1	0.194728	HKG
Housekeeping Genes	Rpl7	ribosomal protein L7	M_gon1	406.764	HKG
Housekeeping Genes	LOC100159815	acetylcholinesterase 1	M_gon1	10.2322	HKG
Housekeeping Genes	Rpl32	ribosomal protein L32	M_gon1	436.029	HKG
Housekeeping Genes	Rpl12	ribosomal protein L12	M_gon1	205.53	HKG
Esterase	LOC100159239	esterase E4	M_gon2	11.3169	XGF
Esterase	LOC100159839	esterase E4	M_gon2	11.0076	XGF
Esterase	LOC100160638	esterase FE4	M_gon2	14.4099	XGF
Esterase	LOC100161016	esterase D/formylglutathione hydrolase-like	M_gon2	14.5838	XGF
Esterase	LOC100161742	feruloyl esterase B-like	M_gon2	390.744	XGF
Esterase	LOC100161878	esterase FE4	M_gon2	17.2418	XGF
Esterase	LOC100161942	esterase D/formylglutathione hydrolase-like	M_gon2	31.2805	XGF
Esterase	LOC100162163	esterase E4-like	M_gon2	84.3533	XGF
Esterase	LOC100163178	esterase ybfF-like	M_gon2	9.11462	XGF
Esterase	LOC100163252	esterase FE4	M_gon2	2.80622	XGF
Esterase	LOC100163376	venom carboxylesterase-6	M_gon2	37.1282	XGF
Esterase	LOC100164908	esterase FE4	M_gon2	NA	XGF
Esterase	LOC100165147	esterase FE4-like	M_gon2	2.48544	XGF
Esterase	LOC100165600	esterase FE4-like	M_gon2	0	XGF
Esterase	LOC100166921	esterase FE4	M_gon2	0	XGF
Esterase	LOC100167502	esterase FE4-like	M_gon2	0	XGF
Esterase	LOC100168312	esterase FE4-like	M_gon2	14.0219	XGF
Esterase	LOC100168479	esterase E4	M_gon2	36.648	XGF
Esterase	LOC100168834	esterase E4	M_gon2	224.37	XGF
Esterase	LOC100168842	neuropathy target esterase sws	M_gon2	17.9944	XGF
Esterase	LOC100169534	esterase FE4-like	M_gon2	NA	XGF
Esterase	LOC100569852	esterase E4	M_gon2	23.2968	XGF
Esterase	LOC100570344	esterase E4	M_gon2	7.46857	XGF
Esterase	LOC100571158	esterase FE4	M_gon2	15.726	XGF
Esterase	LOC103308679	esterase E4	M_gon2	0.0119225	XGF
Esterase	LOC103310504	esterase FE4-like	M_gon2	NA	XGF
Esterase	LOC103311606	esterase FE4-like	M_gon2	6.35429	XGF
Esterase	LOC107885829	esterase FE4-like	M_gon2	3.24942	XGF
Esterase	LOC115033729	esterase SG1-like	M_gon2	NA	XGF
Cyctochrome P450	LOC100159215	cytochrome P450 4C1-like	M_gon2	5.19326	XGF
Cyctochrome P450	LOC100159226	probable cytochrome P450 6a13	M_gon2	9.76035	XGF
Cyctochrome P450	LOC100159248	cytochrome P450 protein	M_gon2	12.2545	XGF
Cyctochrome P450	LOC100159333	cytochrome P450 307a1-like	M_gon2	0.0802292	XGF
Cyctochrome P450	LOC100159387	probable cytochrome P450 6a13	M_gon2	4.34819	XGF
Cyctochrome P450	LOC100159506	cytochrome P450 4C1	M_gon2	0.572672	XGF
Cyctochrome P450	LOC100159616	cytochrome P450 315a1, mitochondrial	M_gon2	5.74442	XGF
Cyctochrome P450	LOC100160204	cytochrome P450 307a1-like	M_gon2	0.0192859	XGF
Cyctochrome P450	LOC100160629	cytochrome P450 4C1	M_gon2	55.6041	XGF
Cyctochrome P450	LOC100160738	cytochrome P450 307a1-like	M_gon2	NA	XGF
Cyctochrome P450	LOC100160808	cytochrome P450 4g15-like	M_gon2	5.01493	XGF
Cyctochrome P450	LOC100160895	cytochrome P450 6a2	M_gon2	68.5379	XGF
Cyctochrome P450	LOC100161319	cytochrome P450 4C1	M_gon2	3.37468	XGF
Cyctochrome P450	LOC100161405	cytochrome P450 4C1	M_gon2	31.595	XGF
Cyctochrome P450	LOC100161480	probable cytochrome P450 6a13	M_gon2	0	XGF
Cyctochrome P450	LOC100161627	probable cytochrome P450 6a14	M_gon2	0.588215	XGF
Cyctochrome P450	LOC100161793	probable cytochrome P450 49a1	M_gon2	0.467285	XGF
Cyctochrome P450	LOC100161881	probable cytochrome P450 49a1	M_gon2	4.38742	XGF
Cyctochrome P450	LOC100162056	cytochrome P450 6k1	M_gon2	18.3745	XGF
Cyctochrome P450	LOC100162179	cytochrome P450 4C1	M_gon2	2.47487	XGF
Cyctochrome P450	LOC100162206	probable cytochrome P450 303a1	M_gon2	0.0862323	XGF
Cyctochrome P450	LOC100162372	cytochrome P450 6k1	M_gon2	8.34946	XGF
Cyctochrome P450	LOC100162594	probable cytochrome P450 6a14	M_gon2	11.3075	XGF
Cyctochrome P450	LOC100162836	cytochrome P450 4C1-like	M_gon2	2.14556	XGF
Cyctochrome P450	LOC100162873	cytochrome b561	M_gon2	5.51429	XGF
Cyctochrome P450	LOC100163195	probable cytochrome P450 6a13	M_gon2	8.52542	XGF
Cyctochrome P450	LOC100163313	probable cytochrome P450 6a13	M_gon2	2.87883	XGF
Cyctochrome P450	LOC100163366	cytochrome P450 4C1-like	M_gon2	NA	XGF
Cyctochrome P450	LOC100163652	cytochrome P450 18a1	M_gon2	33.0667	XGF
Cyctochrome P450	LOC100163900	cytochrome P450 6k1	M_gon2	11.4048	XGF
Cyctochrome P450	LOC100164042	probable cytochrome P450 6a13	M_gon2	43.2126	XGF
Cyctochrome P450	LOC100164072	cytochrome P450 4g15	M_gon2	142.552	XGF
Cyctochrome P450	LOC100164459	cytochrome P450 6k1	M_gon2	6.6679	XGF
Cyctochrome P450	LOC100164600	probable cytochrome P450 301a1, mitochondrial	M_gon2	2.5776	XGF
Cyctochrome P450	LOC100164743	cytochrome P450 4V2	M_gon2	7.64252	XGF
Cyctochrome P450	LOC100164959	cytochrome b561	M_gon2	6.89422	XGF
Cyctochrome P450	LOC100165004	cytochrome P450 4C1-like	M_gon2	5.68381	XGF
Cyctochrome P450	LOC100165148	cytochrome P450 4g15	M_gon2	NA	XGF
Cyctochrome P450	LOC100165240	probable cytochrome P450 6a13	M_gon2	2.81379	XGF
Cyctochrome P450	LOC100165691	cytochrome P450 306a1	M_gon2	2.6415	XGF
Cyctochrome P450	LOC100165806	cytochrome P450 302a1, mitochondrial	M_gon2	1.89556	XGF
Cyctochrome P450	LOC100165972	probable cytochrome P450 6a13	M_gon2	15.1858	XGF
Cyctochrome P450	LOC100166635	cytochrome P450 4C1-like	M_gon2	NA	XGF
Cyctochrome P450	LOC100166760	cytochrome P450 4C1	M_gon2	2.4317	XGF
Cyctochrome P450	LOC100167018	cytochrome P450 4g15-like	M_gon2	NA	XGF
Cyctochrome P450	LOC100167264	probable cytochrome P450 6a13	M_gon2	4.28745	XGF
Cyctochrome P450	LOC100167486	cytochrome P450 4C1-like	M_gon2	2.80975	XGF
Cyctochrome P450	LOC100167598	cytochrome c1-like	M_gon2	80.2664	XGF
Cyctochrome P450	LOC100167777	cytochrome P450 4C1	M_gon2	0.33863	XGF
Cyctochrome P450	LOC100167889	cytochrome P450 4C1	M_gon2	31.5057	XGF
Cyctochrome P450	LOC100168007	probable cytochrome P450 6a13	M_gon2	0.573666	XGF
Cyctochrome P450	LOC100168115	cytochrome P450 6a13-like	M_gon2	2.07198	XGF
Cyctochrome P450	LOC100168315	cytochrome P450 4C1	M_gon2	0.807327	XGF
Cyctochrome P450	LOC100168939	probable cytochrome P450 305a1	M_gon2	5.04771	XGF
Cyctochrome P450	LOC100169288	cytochrome b561-like	M_gon2	0.257103	XGF
Cyctochrome P450	LOC100569567	cytochrome P450 6B1	M_gon2	8.35661	XGF
Cyctochrome P450	LOC100570955	cytochrome P450 4C1-like	M_gon2	1.53841	XGF
Cyctochrome P450	LOC100571473	cytochrome P450 302a1, mitochondrial-like	M_gon2	0.746626	XGF
Cyctochrome P450	LOC100571769	cytochrome P450 302a1, mitochondrial-like	M_gon2	NA	XGF
Cyctochrome P450	LOC100571859	cytochrome P450 6d3	M_gon2	2.40476	XGF
Cyctochrome P450	LOC100572007	cytochrome P450 6k1	M_gon2	9.17851	XGF
Cyctochrome P450	LOC100573593	cytochrome P450 4C1	M_gon2	3.48353	XGF
Cyctochrome P450	LOC100574207	cytochrome P450 4c3-like	M_gon2	NA	XGF
Cyctochrome P450	LOC100574719	probable cytochrome P450 6a14	M_gon2	6.36941	XGF
Cyctochrome P450	LOC100574848	cytochrome P450 6j1	M_gon2	0.11673	XGF
Cyctochrome P450	LOC100574879	cytochrome P450 6k1	M_gon2	0.613517	XGF
Cyctochrome P450	LOC100575859	cytochrome P450 4C1-like	M_gon2	4.57431	XGF
Cyctochrome P450	LOC103309082	cytochrome P450 4C1-like	M_gon2	NA	XGF
Cyctochrome P450	LOC103310019	probable cytochrome P450 6a14	M_gon2	NA	XGF
Cyctochrome P450	LOC103310376	cytochrome P450 4C1-like	M_gon2	NA	XGF
Cyctochrome P450	LOC103311596	probable cytochrome P450 6a13	M_gon2	NA	XGF
Cyctochrome P450	LOC107882215	cytochrome P450 6B1-like	M_gon2	NA	XGF
Cyctochrome P450	LOC107883849	cytochrome P450 4C1-like	M_gon2	0.0385717	XGF
Cyctochrome P450	LOC112935894	cytochrome P450 4g15-like	M_gon2	NA	XGF
Cyctochrome P450	LOC115033844	probable cytochrome P450 6a13	M_gon2	NA	XGF
Cyctochrome P450	LOC115034160	cytochrome P450 4d1-like	M_gon2	NA	XGF
ABC Transporter	LOC100159508	ABC transporter G family member 23	M_gon2	0.876037	XGF
ABC Transporter	LOC100165044	ABC transporter G family member 23-like	M_gon2	NA	XGF
ABC Transporter	LOC100165247	ABC transporter G family member 20	M_gon2	35.3819	XGF
ABC Transporter	LOC100165394	ABC transporter G family member 23	M_gon2	72.9771	XGF
ABC Transporter	LOC100165869	ABC transporter G family member 23	M_gon2	20.848	XGF
ABC Transporter	LOC100166121	ABC transporter G family member 9	M_gon2	22.1386	XGF
ABC Transporter	LOC100166151	ABC transporter G family member 23	M_gon2	10.3095	XGF
ABC Transporter	LOC100167984	ABC transporter G family member 23	M_gon2	32.9014	XGF
ABC Transporter	LOC100569509	ABC transporter G family member 23	M_gon2	12.6965	XGF
ABC Transporter	LOC100569709	ABC transporter F family member 4-like	M_gon2	0.0751426	XGF
ABC Transporter	LOC100569882	ABC transporter G family member 23-like	M_gon2	19.2069	XGF
ABC Transporter	LOC100569981	ABC transporter G family member 23-like	M_gon2	0.752045	XGF
ABC Transporter	LOC100570076	ABC transporter G family member 23-like	M_gon2	0.972992	XGF
ABC Transporter	LOC100570379	ABC transporter G family member 23	M_gon2	0.187362	XGF
ABC Transporter	LOC100571600	ABC transporter G family member 20	M_gon2	9.36199	XGF
ABC Transporter	LOC100574876	ABC transporter F family member 4	M_gon2	6.30078	XGF
ABC Transporter	LOC100575686	ABC transporter G family member 23-like	M_gon2	22.3868	XGF
ABC Transporter	LOC103307655	ABC transporter G family member 23	M_gon2	0.869874	XGF
ABC Transporter	LOC103310851	ABC transporter G family member 23-like	M_gon2	6.47367	XGF
Glutathione S-Transferase	Gstcd	glutathione S-transferase, C-terminal domain containing	M_gon2	NA	XGF
Glutathione S-Transferase	LOC100159421	glutathione S-transferase-like	M_gon2	0.292151	XGF
Glutathione S-Transferase	LOC100159718	glutathione S-transferase 1-1-like	M_gon2	0.169178	XGF
Glutathione S-Transferase	LOC100160859	glutathione S-transferase-like	M_gon2	16.2523	XGF
Glutathione S-Transferase	LOC100161459	glutathione S-transferase-like	M_gon2	61.2311	XGF
Glutathione S-Transferase	LOC100164626	glutathione S-transferase 1-1-like	M_gon2	13.1473	XGF
Glutathione S-Transferase	LOC100165764	microsomal glutathione S-transferase 1-like	M_gon2	0.512521	XGF
Glutathione S-Transferase	LOC100166353	glutathione S-transferase theta-1-like	M_gon2	NA	XGF
Glutathione S-Transferase	LOC100167548	glutathione S-transferase omega-1-like	M_gon2	86.9294	XGF
Glutathione S-Transferase	LOC100167788	glutathione S-transferase 1-1-like	M_gon2	NA	XGF
Glutathione S-Transferase	LOC100167906	glutathione S-transferase	M_gon2	778.388	XGF
Glutathione S-Transferase	LOC100168419	glutathione S-transferase, theta class-like	M_gon2	9.55634	XGF
Glutathione S-Transferase	LOC100168850	glutathione S-transferase-like	M_gon2	785.163	XGF
UDP-Glucoronosyltransferase	LOC100158795	UDP-glucuronosyltransferase 2B2-like	M_gon2	NA	XGF
UDP-Glucoronosyltransferase	LOC100159463	UDP-glucuronosyltransferase 2B28	M_gon2	0.469207	XGF
UDP-Glucoronosyltransferase	LOC100159558	UDP-glucuronosyltransferase 2B2-like	M_gon2	0.365591	XGF
UDP-Glucoronosyltransferase	LOC100159580	UDP-glucuronosyltransferase 2C1	M_gon2	9.62507	XGF
UDP-Glucoronosyltransferase	LOC100159691	UDP-glucuronosyltransferase 1-7C	M_gon2	5.00196	XGF
UDP-Glucoronosyltransferase	LOC100160202	UDP-glucuronosyltransferase 2B37	M_gon2	2.87175	XGF
UDP-Glucoronosyltransferase	LOC100160276	UDP-glucuronosyltransferase 2B17	M_gon2	20.731	XGF
UDP-Glucoronosyltransferase	LOC100160324	UDP-glucuronosyltransferase 2C1-like	M_gon2	9.33645	XGF
UDP-Glucoronosyltransferase	LOC100160380	UDP-glucuronosyltransferase 2B10	M_gon2	82.505	XGF
UDP-Glucoronosyltransferase	LOC100160634	UDP-glucuronosyltransferase 2C1	M_gon2	5.71676	XGF
UDP-Glucoronosyltransferase	LOC100160721	UDP-glucuronosyltransferase 2C1	M_gon2	4.26699	XGF
UDP-Glucoronosyltransferase	LOC100160783	UDP-glucuronosyltransferase 2C1	M_gon2	6.68712	XGF
UDP-Glucoronosyltransferase	LOC100160886	UDP-glucuronosyltransferase 2B1	M_gon2	1.63797	XGF
UDP-Glucoronosyltransferase	LOC100161224	UDP-glucuronosyltransferase 2A1	M_gon2	10.7613	XGF
UDP-Glucoronosyltransferase	LOC100161606	UDP-glucuronosyltransferase 2B15	M_gon2	0.84951	XGF
UDP-Glucoronosyltransferase	LOC100161618	UDP-glucuronosyltransferase 2C1	M_gon2	0.0258675	XGF
Housekeeping Genes	LOC100166540	succinate dehydrogenase [ubiquinone] flavoprotein subunit	M_gon2	69.532	HKG
Housekeeping Genes	LOC100574365	elongation factor 1-alpha	M_gon2	1476.6	HKG
Housekeeping Genes	LOC100161360	ATP-dependent RNA helicase me31b	M_gon2	54.5715	HKG
Housekeeping Genes	LOC100169122	glyceraldehyde-3-phosphate dehydrogenase	M_gon2	539.79	HKG
Housekeeping Genes	LOC100159410	40S ribosomal protein S9	M_gon2	316.869	HKG
Housekeeping Genes	LOC100160330	TATA-box-binding protein	M_gon2	11.5796	HKG
Housekeeping Genes	Ube2g1	ubiquitin-conjugating enzyme E2G 1	M_gon2	69.1384	HKG
Housekeeping Genes	Sdhb	succinate dehydrogenase B	M_gon2	172.103	HKG
Housekeeping Genes	LOC100145822	actin	M_gon2	1943.92	HKG
Housekeeping Genes	LOC100162480	60S ribosomal protein L13a	M_gon2	538.979	HKG
Housekeeping Genes	Rps18	ribosomal protein S18	M_gon2	525.092	HKG
Housekeeping Genes	Rpl27	ribosomal protein L27	M_gon2	349.321	HKG
Housekeeping Genes	Tub1	tubulin beta-1	M_gon2	919.066	HKG
Housekeeping Genes	LOC100166732	arginine kinase	M_gon2	473.332	HKG
Housekeeping Genes	LOC100159449	40S ribosomal protein S23-like	M_gon2	594.093	HKG
Housekeeping Genes	LOC100163690	ribosomal protein L11-like	M_gon2	160.871	HKG
Housekeeping Genes	Rpl14	ribosomal protein L14	M_gon2	533.792	HKG
Housekeeping Genes	LOC100160266	40S ribosomal protein S8	M_gon2	269.32	HKG
Housekeeping Genes	Vha36	vacuolar ATPase subunit D	M_gon2	147.395	HKG
Housekeeping Genes	LOC100163455	heat shock 70 kDa protein 4	M_gon2	44.8521	HKG
Housekeeping Genes	ND1	NADH dehydrogenase subunit 1	M_gon2	NA	HKG
Housekeeping Genes	LOC100167446	60S ribosomal protein L8-like	M_gon2	464.488	HKG
Housekeeping Genes	LOC100167366	60S ribosomal protein L4	M_gon2	341.986	HKG
Housekeeping Genes	LOC100167145	heat shock protein 68-like	M_gon2	0.478431	HKG
Housekeeping Genes	Rpl7	ribosomal protein L7	M_gon2	398.567	HKG
Housekeeping Genes	LOC100159815	acetylcholinesterase 1	M_gon2	7.77646	HKG
Housekeeping Genes	Rpl32	ribosomal protein L32	M_gon2	475.813	HKG
Housekeeping Genes	Rpl12	ribosomal protein L12	M_gon2	216.462	HKG
Esterase	LOC100159239	esterase E4	O_gon1	0.567419	XGF
Esterase	LOC100159839	esterase E4	O_gon1	0.30741	XGF
Esterase	LOC100160638	esterase FE4	O_gon1	3.57673	XGF
Esterase	LOC100161016	esterase D/formylglutathione hydrolase-like	O_gon1	22.7544	XGF
Esterase	LOC100161742	feruloyl esterase B-like	O_gon1	149.389	XGF
Esterase	LOC100161878	esterase FE4	O_gon1	0.119614	XGF
Esterase	LOC100161942	esterase D/formylglutathione hydrolase-like	O_gon1	21.2933	XGF
Esterase	LOC100162163	esterase E4-like	O_gon1	0.0103379	XGF
Esterase	LOC100163178	esterase ybfF-like	O_gon1	16.4055	XGF
Esterase	LOC100163252	esterase FE4	O_gon1	0.19596	XGF
Esterase	LOC100163376	venom carboxylesterase-6	O_gon1	0.36147	XGF
Esterase	LOC100164908	esterase FE4	O_gon1	NA	XGF
Esterase	LOC100165147	esterase FE4-like	O_gon1	2.6992	XGF
Esterase	LOC100165600	esterase FE4-like	O_gon1	0.313255	XGF
Esterase	LOC100166921	esterase FE4	O_gon1	0	XGF
Esterase	LOC100167502	esterase FE4-like	O_gon1	0	XGF
Esterase	LOC100168312	esterase FE4-like	O_gon1	0.348537	XGF
Esterase	LOC100168479	esterase E4	O_gon1	3.24313	XGF
Esterase	LOC100168834	esterase E4	O_gon1	2.53472	XGF
Esterase	LOC100168842	neuropathy target esterase sws	O_gon1	12.4069	XGF
Esterase	LOC100169534	esterase FE4-like	O_gon1	NA	XGF
Esterase	LOC100569852	esterase E4	O_gon1	0.36491	XGF
Esterase	LOC100570344	esterase E4	O_gon1	0.126486	XGF
Esterase	LOC100571158	esterase FE4	O_gon1	0.145411	XGF
Esterase	LOC103308679	esterase E4	O_gon1	0.00959103	XGF
Esterase	LOC103310504	esterase FE4-like	O_gon1	NA	XGF
Esterase	LOC103311606	esterase FE4-like	O_gon1	0.0881327	XGF
Esterase	LOC107885829	esterase FE4-like	O_gon1	0.0739879	XGF
Esterase	LOC115033729	esterase SG1-like	O_gon1	NA	XGF
Cyctochrome P450	LOC100159215	cytochrome P450 4C1-like	O_gon1	0.330735	XGF
Cyctochrome P450	LOC100159226	probable cytochrome P450 6a13	O_gon1	0.134557	XGF
Cyctochrome P450	LOC100159248	cytochrome P450 protein	O_gon1	0.311452	XGF
Cyctochrome P450	LOC100159333	cytochrome P450 307a1-like	O_gon1	0	XGF
Cyctochrome P450	LOC100159387	probable cytochrome P450 6a13	O_gon1	0.243439	XGF
Cyctochrome P450	LOC100159506	cytochrome P450 4C1	O_gon1	0.316721	XGF
Cyctochrome P450	LOC100159616	cytochrome P450 315a1, mitochondrial	O_gon1	6.41819	XGF
Cyctochrome P450	LOC100160204	cytochrome P450 307a1-like	O_gon1	0.31029	XGF
Cyctochrome P450	LOC100160629	cytochrome P450 4C1	O_gon1	27.1182	XGF
Cyctochrome P450	LOC100160738	cytochrome P450 307a1-like	O_gon1	NA	XGF
Cyctochrome P450	LOC100160808	cytochrome P450 4g15-like	O_gon1	0.0125678	XGF
Cyctochrome P450	LOC100160895	cytochrome P450 6a2	O_gon1	0.235429	XGF
Cyctochrome P450	LOC100161319	cytochrome P450 4C1	O_gon1	0	XGF
Cyctochrome P450	LOC100161405	cytochrome P450 4C1	O_gon1	23.854	XGF
Cyctochrome P450	LOC100161480	probable cytochrome P450 6a13	O_gon1	0.472344	XGF
Cyctochrome P450	LOC100161627	probable cytochrome P450 6a14	O_gon1	0.00739358	XGF
Cyctochrome P450	LOC100161793	probable cytochrome P450 49a1	O_gon1	0.0225544	XGF
Cyctochrome P450	LOC100161881	probable cytochrome P450 49a1	O_gon1	7.70812	XGF
Cyctochrome P450	LOC100162056	cytochrome P450 6k1	O_gon1	33.0887	XGF
Cyctochrome P450	LOC100162179	cytochrome P450 4C1	O_gon1	1.19099	XGF
Cyctochrome P450	LOC100162206	probable cytochrome P450 303a1	O_gon1	0.0346847	XGF
Cyctochrome P450	LOC100162372	cytochrome P450 6k1	O_gon1	0.497534	XGF
Cyctochrome P450	LOC100162594	probable cytochrome P450 6a14	O_gon1	1.69037	XGF
Cyctochrome P450	LOC100162836	cytochrome P450 4C1-like	O_gon1	0	XGF
Cyctochrome P450	LOC100162873	cytochrome b561	O_gon1	0.995326	XGF
Cyctochrome P450	LOC100163195	probable cytochrome P450 6a13	O_gon1	0.133602	XGF
Cyctochrome P450	LOC100163313	probable cytochrome P450 6a13	O_gon1	0.0180125	XGF
Cyctochrome P450	LOC100163366	cytochrome P450 4C1-like	O_gon1	NA	XGF
Cyctochrome P450	LOC100163652	cytochrome P450 18a1	O_gon1	0.191485	XGF
Cyctochrome P450	LOC100163900	cytochrome P450 6k1	O_gon1	0.131922	XGF
Cyctochrome P450	LOC100164042	probable cytochrome P450 6a13	O_gon1	1.7972	XGF
Cyctochrome P450	LOC100164072	cytochrome P450 4g15	O_gon1	3.83217	XGF
Cyctochrome P450	LOC100164459	cytochrome P450 6k1	O_gon1	0.0100074	XGF
Cyctochrome P450	LOC100164600	probable cytochrome P450 301a1, mitochondrial	O_gon1	0.0218268	XGF
Cyctochrome P450	LOC100164743	cytochrome P450 4V2	O_gon1	22.3584	XGF
Cyctochrome P450	LOC100164959	cytochrome b561	O_gon1	0.655134	XGF
Cyctochrome P450	LOC100165004	cytochrome P450 4C1-like	O_gon1	0	XGF
Cyctochrome P450	LOC100165148	cytochrome P450 4g15	O_gon1	NA	XGF
Cyctochrome P450	LOC100165240	probable cytochrome P450 6a13	O_gon1	0.150903	XGF
Cyctochrome P450	LOC100165691	cytochrome P450 306a1	O_gon1	3.61906	XGF
Cyctochrome P450	LOC100165806	cytochrome P450 302a1, mitochondrial	O_gon1	2.36357	XGF
Cyctochrome P450	LOC100165972	probable cytochrome P450 6a13	O_gon1	0.458666	XGF
Cyctochrome P450	LOC100166635	cytochrome P450 4C1-like	O_gon1	NA	XGF
Cyctochrome P450	LOC100166760	cytochrome P450 4C1	O_gon1	1.11147	XGF
Cyctochrome P450	LOC100167018	cytochrome P450 4g15-like	O_gon1	NA	XGF
Cyctochrome P450	LOC100167264	probable cytochrome P450 6a13	O_gon1	0.0544585	XGF
Cyctochrome P450	LOC100167486	cytochrome P450 4C1-like	O_gon1	0.0361648	XGF
Cyctochrome P450	LOC100167598	cytochrome c1-like	O_gon1	74.3658	XGF
Cyctochrome P450	LOC100167777	cytochrome P450 4C1	O_gon1	0.668643	XGF
Cyctochrome P450	LOC100167889	cytochrome P450 4C1	O_gon1	0.115994	XGF
Cyctochrome P450	LOC100168007	probable cytochrome P450 6a13	O_gon1	0	XGF
Cyctochrome P450	LOC100168115	cytochrome P450 6a13-like	O_gon1	0.0138819	XGF
Cyctochrome P450	LOC100168315	cytochrome P450 4C1	O_gon1	0	XGF
Cyctochrome P450	LOC100168939	probable cytochrome P450 305a1	O_gon1	1.31906	XGF
Cyctochrome P450	LOC100169288	cytochrome b561-like	O_gon1	0.034471	XGF
Cyctochrome P450	LOC100569567	cytochrome P450 6B1	O_gon1	0.0734268	XGF
Cyctochrome P450	LOC100570955	cytochrome P450 4C1-like	O_gon1	0.0590446	XGF
Cyctochrome P450	LOC100571473	cytochrome P450 302a1, mitochondrial-like	O_gon1	1.17814	XGF
Cyctochrome P450	LOC100571769	cytochrome P450 302a1, mitochondrial-like	O_gon1	NA	XGF
Cyctochrome P450	LOC100571859	cytochrome P450 6d3	O_gon1	0.0269956	XGF
Cyctochrome P450	LOC100572007	cytochrome P450 6k1	O_gon1	0.3134	XGF
Cyctochrome P450	LOC100573593	cytochrome P450 4C1	O_gon1	1.40116	XGF
Cyctochrome P450	LOC100574207	cytochrome P450 4c3-like	O_gon1	NA	XGF
Cyctochrome P450	LOC100574719	probable cytochrome P450 6a14	O_gon1	0.129849	XGF
Cyctochrome P450	LOC100574848	cytochrome P450 6j1	O_gon1	0.176068	XGF
Cyctochrome P450	LOC100574879	cytochrome P450 6k1	O_gon1	0	XGF
Cyctochrome P450	LOC100575859	cytochrome P450 4C1-like	O_gon1	0.32491	XGF
Cyctochrome P450	LOC103309082	cytochrome P450 4C1-like	O_gon1	NA	XGF
Cyctochrome P450	LOC103310019	probable cytochrome P450 6a14	O_gon1	NA	XGF
Cyctochrome P450	LOC103310376	cytochrome P450 4C1-like	O_gon1	NA	XGF
Cyctochrome P450	LOC103311596	probable cytochrome P450 6a13	O_gon1	NA	XGF
Cyctochrome P450	LOC107882215	cytochrome P450 6B1-like	O_gon1	NA	XGF
Cyctochrome P450	LOC107883849	cytochrome P450 4C1-like	O_gon1	17.7641	XGF
Cyctochrome P450	LOC112935894	cytochrome P450 4g15-like	O_gon1	NA	XGF
Cyctochrome P450	LOC115033844	probable cytochrome P450 6a13	O_gon1	NA	XGF
Cyctochrome P450	LOC115034160	cytochrome P450 4d1-like	O_gon1	NA	XGF
ABC Transporter	LOC100159508	ABC transporter G family member 23	O_gon1	1.46929	XGF
ABC Transporter	LOC100165044	ABC transporter G family member 23-like	O_gon1	NA	XGF
ABC Transporter	LOC100165247	ABC transporter G family member 20	O_gon1	2.79492	XGF
ABC Transporter	LOC100165394	ABC transporter G family member 23	O_gon1	14.4831	XGF
ABC Transporter	LOC100165869	ABC transporter G family member 23	O_gon1	0.0700743	XGF
ABC Transporter	LOC100166121	ABC transporter G family member 9	O_gon1	19.8005	XGF
ABC Transporter	LOC100166151	ABC transporter G family member 23	O_gon1	0.138225	XGF
ABC Transporter	LOC100167984	ABC transporter G family member 23	O_gon1	0.139744	XGF
ABC Transporter	LOC100569509	ABC transporter G family member 23	O_gon1	0.585784	XGF
ABC Transporter	LOC100569709	ABC transporter F family member 4-like	O_gon1	0.0302242	XGF
ABC Transporter	LOC100569882	ABC transporter G family member 23-like	O_gon1	0.293721	XGF
ABC Transporter	LOC100569981	ABC transporter G family member 23-like	O_gon1	0.043213	XGF
ABC Transporter	LOC100570076	ABC transporter G family member 23-like	O_gon1	0.0343299	XGF
ABC Transporter	LOC100570379	ABC transporter G family member 23	O_gon1	1.44443	XGF
ABC Transporter	LOC100571600	ABC transporter G family member 20	O_gon1	0.17865	XGF
ABC Transporter	LOC100574876	ABC transporter F family member 4	O_gon1	214.167	XGF
ABC Transporter	LOC100575686	ABC transporter G family member 23-like	O_gon1	0	XGF
ABC Transporter	LOC103307655	ABC transporter G family member 23	O_gon1	3.66941	XGF
ABC Transporter	LOC103310851	ABC transporter G family member 23-like	O_gon1	0.0867955	XGF
Glutathione S-Transferase	Gstcd	glutathione S-transferase, C-terminal domain containing	O_gon1	NA	XGF
Glutathione S-Transferase	LOC100159421	glutathione S-transferase-like	O_gon1	30.1414	XGF
Glutathione S-Transferase	LOC100159718	glutathione S-transferase 1-1-like	O_gon1	0	XGF
Glutathione S-Transferase	LOC100160859	glutathione S-transferase-like	O_gon1	0.183282	XGF
Glutathione S-Transferase	LOC100161459	glutathione S-transferase-like	O_gon1	0.73061	XGF
Glutathione S-Transferase	LOC100164626	glutathione S-transferase 1-1-like	O_gon1	1.92497	XGF
Glutathione S-Transferase	LOC100165764	microsomal glutathione S-transferase 1-like	O_gon1	0.0773056	XGF
Glutathione S-Transferase	LOC100166353	glutathione S-transferase theta-1-like	O_gon1	NA	XGF
Glutathione S-Transferase	LOC100167548	glutathione S-transferase omega-1-like	O_gon1	34.6682	XGF
Glutathione S-Transferase	LOC100167788	glutathione S-transferase 1-1-like	O_gon1	NA	XGF
Glutathione S-Transferase	LOC100167906	glutathione S-transferase	O_gon1	326.346	XGF
Glutathione S-Transferase	LOC100168419	glutathione S-transferase, theta class-like	O_gon1	25.7166	XGF
Glutathione S-Transferase	LOC100168850	glutathione S-transferase-like	O_gon1	53.3805	XGF
UDP-Glucoronosyltransferase	LOC100158795	UDP-glucuronosyltransferase 2B2-like	O_gon1	NA	XGF
UDP-Glucoronosyltransferase	LOC100159463	UDP-glucuronosyltransferase 2B28	O_gon1	1.87828	XGF
UDP-Glucoronosyltransferase	LOC100159558	UDP-glucuronosyltransferase 2B2-like	O_gon1	0.105035	XGF
UDP-Glucoronosyltransferase	LOC100159580	UDP-glucuronosyltransferase 2C1	O_gon1	0.666395	XGF
UDP-Glucoronosyltransferase	LOC100159691	UDP-glucuronosyltransferase 1-7C	O_gon1	0.395918	XGF
UDP-Glucoronosyltransferase	LOC100160202	UDP-glucuronosyltransferase 2B37	O_gon1	0.0613321	XGF
UDP-Glucoronosyltransferase	LOC100160276	UDP-glucuronosyltransferase 2B17	O_gon1	3.49054	XGF
UDP-Glucoronosyltransferase	LOC100160324	UDP-glucuronosyltransferase 2C1-like	O_gon1	0.601185	XGF
UDP-Glucoronosyltransferase	LOC100160380	UDP-glucuronosyltransferase 2B10	O_gon1	38.7347	XGF
UDP-Glucoronosyltransferase	LOC100160634	UDP-glucuronosyltransferase 2C1	O_gon1	0.0986551	XGF
UDP-Glucoronosyltransferase	LOC100160721	UDP-glucuronosyltransferase 2C1	O_gon1	8.54689	XGF
UDP-Glucoronosyltransferase	LOC100160783	UDP-glucuronosyltransferase 2C1	O_gon1	12.6619	XGF
UDP-Glucoronosyltransferase	LOC100160886	UDP-glucuronosyltransferase 2B1	O_gon1	2.35533	XGF
UDP-Glucoronosyltransferase	LOC100161224	UDP-glucuronosyltransferase 2A1	O_gon1	28.265	XGF
UDP-Glucoronosyltransferase	LOC100161606	UDP-glucuronosyltransferase 2B15	O_gon1	0.628275	XGF
UDP-Glucoronosyltransferase	LOC100161618	UDP-glucuronosyltransferase 2C1	O_gon1	0.156068	XGF
Housekeeping Genes	LOC100166540	succinate dehydrogenase [ubiquinone] flavoprotein subunit	O_gon1	32.6527	HKG
Housekeeping Genes	LOC100574365	elongation factor 1-alpha	O_gon1	1228.93	HKG
Housekeeping Genes	LOC100161360	ATP-dependent RNA helicase me31b	O_gon1	174.976	HKG
Housekeeping Genes	LOC100169122	glyceraldehyde-3-phosphate dehydrogenase	O_gon1	604.942	HKG
Housekeeping Genes	LOC100159410	40S ribosomal protein S9	O_gon1	252.474	HKG
Housekeeping Genes	LOC100160330	TATA-box-binding protein	O_gon1	22.8626	HKG
Housekeeping Genes	Ube2g1	ubiquitin-conjugating enzyme E2G 1	O_gon1	118.132	HKG
Housekeeping Genes	Sdhb	succinate dehydrogenase B	O_gon1	69.3951	HKG
Housekeeping Genes	LOC100145822	actin	O_gon1	1010.2	HKG
Housekeeping Genes	LOC100162480	60S ribosomal protein L13a	O_gon1	524.364	HKG
Housekeeping Genes	Rps18	ribosomal protein S18	O_gon1	389.334	HKG
Housekeeping Genes	Rpl27	ribosomal protein L27	O_gon1	321.234	HKG
Housekeeping Genes	Tub1	tubulin beta-1	O_gon1	703.325	HKG
Housekeeping Genes	LOC100166732	arginine kinase	O_gon1	0.597628	HKG
Housekeeping Genes	LOC100159449	40S ribosomal protein S23-like	O_gon1	407.341	HKG
Housekeeping Genes	LOC100163690	ribosomal protein L11-like	O_gon1	134.722	HKG
Housekeeping Genes	Rpl14	ribosomal protein L14	O_gon1	487.781	HKG
Housekeeping Genes	LOC100160266	40S ribosomal protein S8	O_gon1	344.597	HKG
Housekeeping Genes	Vha36	vacuolar ATPase subunit D	O_gon1	89.1233	HKG
Housekeeping Genes	LOC100163455	heat shock 70 kDa protein 4	O_gon1	124.336	HKG
Housekeeping Genes	ND1	NADH dehydrogenase subunit 1	O_gon1	NA	HKG
Housekeeping Genes	LOC100167446	60S ribosomal protein L8-like	O_gon1	339.531	HKG
Housekeeping Genes	LOC100167366	60S ribosomal protein L4	O_gon1	307.88	HKG
Housekeeping Genes	LOC100167145	heat shock protein 68-like	O_gon1	11.2868	HKG
Housekeeping Genes	Rpl7	ribosomal protein L7	O_gon1	398.346	HKG
Housekeeping Genes	LOC100159815	acetylcholinesterase 1	O_gon1	13.1267	HKG
Housekeeping Genes	Rpl32	ribosomal protein L32	O_gon1	369.93	HKG
Housekeeping Genes	Rpl12	ribosomal protein L12	O_gon1	165.139	HKG
Esterase	LOC100159239	esterase E4	O_gon2	0.217623	XGF
Esterase	LOC100159839	esterase E4	O_gon2	0.0314403	XGF
Esterase	LOC100160638	esterase FE4	O_gon2	3.56995	XGF
Esterase	LOC100161016	esterase D/formylglutathione hydrolase-like	O_gon2	23.6502	XGF
Esterase	LOC100161742	feruloyl esterase B-like	O_gon2	149.044	XGF
Esterase	LOC100161878	esterase FE4	O_gon2	0	XGF
Esterase	LOC100161942	esterase D/formylglutathione hydrolase-like	O_gon2	21.2705	XGF
Esterase	LOC100162163	esterase E4-like	O_gon2	0.0211461	XGF
Esterase	LOC100163178	esterase ybfF-like	O_gon2	16.5904	XGF
Esterase	LOC100163252	esterase FE4	O_gon2	0.224468	XGF
Esterase	LOC100163376	venom carboxylesterase-6	O_gon2	0.369693	XGF
Esterase	LOC100164908	esterase FE4	O_gon2	NA	XGF
Esterase	LOC100165147	esterase FE4-like	O_gon2	2.30515	XGF
Esterase	LOC100165600	esterase FE4-like	O_gon2	0.320382	XGF
Esterase	LOC100166921	esterase FE4	O_gon2	0	XGF
Esterase	LOC100167502	esterase FE4-like	O_gon2	0	XGF
Esterase	LOC100168312	esterase FE4-like	O_gon2	0.0648119	XGF
Esterase	LOC100168479	esterase E4	O_gon2	3.03407	XGF
Esterase	LOC100168834	esterase E4	O_gon2	2.39549	XGF
Esterase	LOC100168842	neuropathy target esterase sws	O_gon2	12.4673	XGF
Esterase	LOC100169534	esterase FE4-like	O_gon2	NA	XGF
Esterase	LOC100569852	esterase E4	O_gon2	0.050683	XGF
Esterase	LOC100570344	esterase E4	O_gon2	0.0215606	XGF
Esterase	LOC100571158	esterase FE4	O_gon2	0.0743596	XGF
Esterase	LOC103308679	esterase E4	O_gon2	0.0294276	XGF
Esterase	LOC103310504	esterase FE4-like	O_gon2	NA	XGF
Esterase	LOC103311606	esterase FE4-like	O_gon2	0.0180275	XGF
Esterase	LOC107885829	esterase FE4-like	O_gon2	0.0189178	XGF
Esterase	LOC115033729	esterase SG1-like	O_gon2	NA	XGF
Cyctochrome P450	LOC100159215	cytochrome P450 4C1-like	O_gon2	0.480684	XGF
Cyctochrome P450	LOC100159226	probable cytochrome P450 6a13	O_gon2	0.0157278	XGF
Cyctochrome P450	LOC100159248	cytochrome P450 protein	O_gon2	0.0830965	XGF
Cyctochrome P450	LOC100159333	cytochrome P450 307a1-like	O_gon2	0	XGF
Cyctochrome P450	LOC100159387	probable cytochrome P450 6a13	O_gon2	0.232836	XGF
Cyctochrome P450	LOC100159506	cytochrome P450 4C1	O_gon2	0.368098	XGF
Cyctochrome P450	LOC100159616	cytochrome P450 315a1, mitochondrial	O_gon2	7.02125	XGF
Cyctochrome P450	LOC100160204	cytochrome P450 307a1-like	O_gon2	0.309415	XGF
Cyctochrome P450	LOC100160629	cytochrome P450 4C1	O_gon2	25.4325	XGF
Cyctochrome P450	LOC100160738	cytochrome P450 307a1-like	O_gon2	NA	XGF
Cyctochrome P450	LOC100160808	cytochrome P450 4g15-like	O_gon2	0	XGF
Cyctochrome P450	LOC100160895	cytochrome P450 6a2	O_gon2	0.0802615	XGF
Cyctochrome P450	LOC100161319	cytochrome P450 4C1	O_gon2	0.0118655	XGF
Cyctochrome P450	LOC100161405	cytochrome P450 4C1	O_gon2	21.632	XGF
Cyctochrome P450	LOC100161480	probable cytochrome P450 6a13	O_gon2	0.0089461	XGF
Cyctochrome P450	LOC100161627	probable cytochrome P450 6a14	O_gon2	0.0302471	XGF
Cyctochrome P450	LOC100161793	probable cytochrome P450 49a1	O_gon2	0.00768916	XGF
Cyctochrome P450	LOC100161881	probable cytochrome P450 49a1	O_gon2	8.0892	XGF
Cyctochrome P450	LOC100162056	cytochrome P450 6k1	O_gon2	27.7987	XGF
Cyctochrome P450	LOC100162179	cytochrome P450 4C1	O_gon2	1.26353	XGF
Cyctochrome P450	LOC100162206	probable cytochrome P450 303a1	O_gon2	0.0177369	XGF
Cyctochrome P450	LOC100162372	cytochrome P450 6k1	O_gon2	0.393204	XGF
Cyctochrome P450	LOC100162594	probable cytochrome P450 6a14	O_gon2	1.79091	XGF
Cyctochrome P450	LOC100162836	cytochrome P450 4C1-like	O_gon2	0	XGF
Cyctochrome P450	LOC100162873	cytochrome b561	O_gon2	0.678646	XGF
Cyctochrome P450	LOC100163195	probable cytochrome P450 6a13	O_gon2	0.0227736	XGF
Cyctochrome P450	LOC100163313	probable cytochrome P450 6a13	O_gon2	0	XGF
Cyctochrome P450	LOC100163366	cytochrome P450 4C1-like	O_gon2	NA	XGF
Cyctochrome P450	LOC100163652	cytochrome P450 18a1	O_gon2	0.359042	XGF
Cyctochrome P450	LOC100163900	cytochrome P450 6k1	O_gon2	0.0245314	XGF
Cyctochrome P450	LOC100164042	probable cytochrome P450 6a13	O_gon2	1.73737	XGF
Cyctochrome P450	LOC100164072	cytochrome P450 4g15	O_gon2	4.92633	XGF
Cyctochrome P450	LOC100164459	cytochrome P450 6k1	O_gon2	0.0102351	XGF
Cyctochrome P450	LOC100164600	probable cytochrome P450 301a1, mitochondrial	O_gon2	0.178587	XGF
Cyctochrome P450	LOC100164743	cytochrome P450 4V2	O_gon2	21.9532	XGF
Cyctochrome P450	LOC100164959	cytochrome b561	O_gon2	0.866428	XGF
Cyctochrome P450	LOC100165004	cytochrome P450 4C1-like	O_gon2	0	XGF
Cyctochrome P450	LOC100165148	cytochrome P450 4g15	O_gon2	NA	XGF
Cyctochrome P450	LOC100165240	probable cytochrome P450 6a13	O_gon2	0.138903	XGF
Cyctochrome P450	LOC100165691	cytochrome P450 306a1	O_gon2	4.45694	XGF
Cyctochrome P450	LOC100165806	cytochrome P450 302a1, mitochondrial	O_gon2	2.4	XGF
Cyctochrome P450	LOC100165972	probable cytochrome P450 6a13	O_gon2	0.594956	XGF
Cyctochrome P450	LOC100166635	cytochrome P450 4C1-like	O_gon2	NA	XGF
Cyctochrome P450	LOC100166760	cytochrome P450 4C1	O_gon2	1.19131	XGF
Cyctochrome P450	LOC100167018	cytochrome P450 4g15-like	O_gon2	NA	XGF
Cyctochrome P450	LOC100167264	probable cytochrome P450 6a13	O_gon2	0.0464144	XGF
Cyctochrome P450	LOC100167486	cytochrome P450 4C1-like	O_gon2	0.0184938	XGF
Cyctochrome P450	LOC100167598	cytochrome c1-like	O_gon2	74.3422	XGF
Cyctochrome P450	LOC100167777	cytochrome P450 4C1	O_gon2	1.45636	XGF
Cyctochrome P450	LOC100167889	cytochrome P450 4C1	O_gon2	0.257038	XGF
Cyctochrome P450	LOC100168007	probable cytochrome P450 6a13	O_gon2	0.0112377	XGF
Cyctochrome P450	LOC100168115	cytochrome P450 6a13-like	O_gon2	0.0425932	XGF
Cyctochrome P450	LOC100168315	cytochrome P450 4C1	O_gon2	0.0359042	XGF
Cyctochrome P450	LOC100168939	probable cytochrome P450 305a1	O_gon2	1.20358	XGF
Cyctochrome P450	LOC100169288	cytochrome b561-like	O_gon2	0.0176276	XGF
Cyctochrome P450	LOC100569567	cytochrome P450 6B1	O_gon2	0	XGF
Cyctochrome P450	LOC100570955	cytochrome P450 4C1-like	O_gon2	0.054047	XGF
Cyctochrome P450	LOC100571473	cytochrome P450 302a1, mitochondrial-like	O_gon2	1.74835	XGF
Cyctochrome P450	LOC100571769	cytochrome P450 302a1, mitochondrial-like	O_gon2	NA	XGF
Cyctochrome P450	LOC100571859	cytochrome P450 6d3	O_gon2	0	XGF
Cyctochrome P450	LOC100572007	cytochrome P450 6k1	O_gon2	0.244333	XGF
Cyctochrome P450	LOC100573593	cytochrome P450 4C1	O_gon2	1.62553	XGF
Cyctochrome P450	LOC100574207	cytochrome P450 4c3-like	O_gon2	NA	XGF
Cyctochrome P450	LOC100574719	probable cytochrome P450 6a14	O_gon2	0.0922867	XGF
Cyctochrome P450	LOC100574848	cytochrome P450 6j1	O_gon2	0	XGF
Cyctochrome P450	LOC100574879	cytochrome P450 6k1	O_gon2	0	XGF
Cyctochrome P450	LOC100575859	cytochrome P450 4C1-like	O_gon2	0.239566	XGF
Cyctochrome P450	LOC103309082	cytochrome P450 4C1-like	O_gon2	NA	XGF
Cyctochrome P450	LOC103310019	probable cytochrome P450 6a14	O_gon2	NA	XGF
Cyctochrome P450	LOC103310376	cytochrome P450 4C1-like	O_gon2	NA	XGF
Cyctochrome P450	LOC103311596	probable cytochrome P450 6a13	O_gon2	NA	XGF
Cyctochrome P450	LOC107882215	cytochrome P450 6B1-like	O_gon2	NA	XGF
Cyctochrome P450	LOC107883849	cytochrome P450 4C1-like	O_gon2	20.3262	XGF
Cyctochrome P450	LOC112935894	cytochrome P450 4g15-like	O_gon2	NA	XGF
Cyctochrome P450	LOC115033844	probable cytochrome P450 6a13	O_gon2	NA	XGF
Cyctochrome P450	LOC115034160	cytochrome P450 4d1-like	O_gon2	NA	XGF
ABC Transporter	LOC100159508	ABC transporter G family member 23	O_gon2	1.84949	XGF
ABC Transporter	LOC100165044	ABC transporter G family member 23-like	O_gon2	NA	XGF
ABC Transporter	LOC100165247	ABC transporter G family member 20	O_gon2	2.84449	XGF
ABC Transporter	LOC100165394	ABC transporter G family member 23	O_gon2	13.8054	XGF
ABC Transporter	LOC100165869	ABC transporter G family member 23	O_gon2	0.119447	XGF
ABC Transporter	LOC100166121	ABC transporter G family member 9	O_gon2	21.3993	XGF
ABC Transporter	LOC100166151	ABC transporter G family member 23	O_gon2	0.18378	XGF
ABC Transporter	LOC100167984	ABC transporter G family member 23	O_gon2	0.150069	XGF
ABC Transporter	LOC100569509	ABC transporter G family member 23	O_gon2	0.814175	XGF
ABC Transporter	LOC100569709	ABC transporter F family member 4-like	O_gon2	0.0154559	XGF
ABC Transporter	LOC100569882	ABC transporter G family member 23-like	O_gon2	0.240322	XGF
ABC Transporter	LOC100569981	ABC transporter G family member 23-like	O_gon2	0.00883921	XGF
ABC Transporter	LOC100570076	ABC transporter G family member 23-like	O_gon2	0.0140444	XGF
ABC Transporter	LOC100570379	ABC transporter G family member 23	O_gon2	1.1176	XGF
ABC Transporter	LOC100571600	ABC transporter G family member 20	O_gon2	0.295566	XGF
ABC Transporter	LOC100574876	ABC transporter F family member 4	O_gon2	240.966	XGF
ABC Transporter	LOC100575686	ABC transporter G family member 23-like	O_gon2	0	XGF
ABC Transporter	LOC103307655	ABC transporter G family member 23	O_gon2	3.74394	XGF
ABC Transporter	LOC103310851	ABC transporter G family member 23-like	O_gon2	0.08877	XGF
Glutathione S-Transferase	Gstcd	glutathione S-transferase, C-terminal domain containing	O_gon2	NA	XGF
Glutathione S-Transferase	LOC100159421	glutathione S-transferase-like	O_gon2	27.896	XGF
Glutathione S-Transferase	LOC100159718	glutathione S-transferase 1-1-like	O_gon2	0.0347977	XGF
Glutathione S-Transferase	LOC100160859	glutathione S-transferase-like	O_gon2	0.229107	XGF
Glutathione S-Transferase	LOC100161459	glutathione S-transferase-like	O_gon2	0.506189	XGF
Glutathione S-Transferase	LOC100164626	glutathione S-transferase 1-1-like	O_gon2	0.045259	XGF
Glutathione S-Transferase	LOC100165764	microsomal glutathione S-transferase 1-like	O_gon2	0	XGF
Glutathione S-Transferase	LOC100166353	glutathione S-transferase theta-1-like	O_gon2	NA	XGF
Glutathione S-Transferase	LOC100167548	glutathione S-transferase omega-1-like	O_gon2	37.9398	XGF
Glutathione S-Transferase	LOC100167788	glutathione S-transferase 1-1-like	O_gon2	NA	XGF
Glutathione S-Transferase	LOC100167906	glutathione S-transferase	O_gon2	369.965	XGF
Glutathione S-Transferase	LOC100168419	glutathione S-transferase, theta class-like	O_gon2	25.0942	XGF
Glutathione S-Transferase	LOC100168850	glutathione S-transferase-like	O_gon2	57.9224	XGF
UDP-Glucoronosyltransferase	LOC100158795	UDP-glucuronosyltransferase 2B2-like	O_gon2	NA	XGF
UDP-Glucoronosyltransferase	LOC100159463	UDP-glucuronosyltransferase 2B28	O_gon2	2.29785	XGF
UDP-Glucoronosyltransferase	LOC100159558	UDP-glucuronosyltransferase 2B2-like	O_gon2	0.17188	XGF
UDP-Glucoronosyltransferase	LOC100159580	UDP-glucuronosyltransferase 2C1	O_gon2	0.692373	XGF
UDP-Glucoronosyltransferase	LOC100159691	UDP-glucuronosyltransferase 1-7C	O_gon2	0.603255	XGF
UDP-Glucoronosyltransferase	LOC100160202	UDP-glucuronosyltransferase 2B37	O_gon2	0	XGF
UDP-Glucoronosyltransferase	LOC100160276	UDP-glucuronosyltransferase 2B17	O_gon2	2.90885	XGF
UDP-Glucoronosyltransferase	LOC100160324	UDP-glucuronosyltransferase 2C1-like	O_gon2	0.909657	XGF
UDP-Glucoronosyltransferase	LOC100160380	UDP-glucuronosyltransferase 2B10	O_gon2	35.2545	XGF
UDP-Glucoronosyltransferase	LOC100160634	UDP-glucuronosyltransferase 2C1	O_gon2	0.0776149	XGF
UDP-Glucoronosyltransferase	LOC100160721	UDP-glucuronosyltransferase 2C1	O_gon2	8.96515	XGF
UDP-Glucoronosyltransferase	LOC100160783	UDP-glucuronosyltransferase 2C1	O_gon2	16.375	XGF
UDP-Glucoronosyltransferase	LOC100160886	UDP-glucuronosyltransferase 2B1	O_gon2	2.26218	XGF
UDP-Glucoronosyltransferase	LOC100161224	UDP-glucuronosyltransferase 2A1	O_gon2	32.3409	XGF
UDP-Glucoronosyltransferase	LOC100161606	UDP-glucuronosyltransferase 2B15	O_gon2	0.732753	XGF
UDP-Glucoronosyltransferase	LOC100161618	UDP-glucuronosyltransferase 2C1	O_gon2	0.297955	XGF
Housekeeping Genes	LOC100166540	succinate dehydrogenase [ubiquinone] flavoprotein subunit	O_gon2	40.5867	HKG
Housekeeping Genes	LOC100574365	elongation factor 1-alpha	O_gon2	1391.66	HKG
Housekeeping Genes	LOC100161360	ATP-dependent RNA helicase me31b	O_gon2	179.86	HKG
Housekeeping Genes	LOC100169122	glyceraldehyde-3-phosphate dehydrogenase	O_gon2	779.906	HKG
Housekeeping Genes	LOC100159410	40S ribosomal protein S9	O_gon2	257.869	HKG
Housekeeping Genes	LOC100160330	TATA-box-binding protein	O_gon2	23.7955	HKG
Housekeeping Genes	Ube2g1	ubiquitin-conjugating enzyme E2G 1	O_gon2	121.231	HKG
Housekeeping Genes	Sdhb	succinate dehydrogenase B	O_gon2	75.84	HKG
Housekeeping Genes	LOC100145822	actin	O_gon2	1254.13	HKG
Housekeeping Genes	LOC100162480	60S ribosomal protein L13a	O_gon2	547.52	HKG
Housekeeping Genes	Rps18	ribosomal protein S18	O_gon2	406.861	HKG
Housekeeping Genes	Rpl27	ribosomal protein L27	O_gon2	326.775	HKG
Housekeeping Genes	Tub1	tubulin beta-1	O_gon2	750.119	HKG
Housekeeping Genes	LOC100166732	arginine kinase	O_gon2	0.395498	HKG
Housekeeping Genes	LOC100159449	40S ribosomal protein S23-like	O_gon2	409.306	HKG
Housekeeping Genes	LOC100163690	ribosomal protein L11-like	O_gon2	131.82	HKG
Housekeeping Genes	Rpl14	ribosomal protein L14	O_gon2	470.934	HKG
Housekeeping Genes	LOC100160266	40S ribosomal protein S8	O_gon2	352.525	HKG
Housekeeping Genes	Vha36	vacuolar ATPase subunit D	O_gon2	90.4599	HKG
Housekeeping Genes	LOC100163455	heat shock 70 kDa protein 4	O_gon2	135.194	HKG
Housekeeping Genes	ND1	NADH dehydrogenase subunit 1	O_gon2	NA	HKG
Housekeeping Genes	LOC100167446	60S ribosomal protein L8-like	O_gon2	360.813	HKG
Housekeeping Genes	LOC100167366	60S ribosomal protein L4	O_gon2	322.081	HKG
Housekeeping Genes	LOC100167145	heat shock protein 68-like	O_gon2	11.4666	HKG
Housekeeping Genes	Rpl7	ribosomal protein L7	O_gon2	403.005	HKG
Housekeeping Genes	LOC100159815	acetylcholinesterase 1	O_gon2	13.9353	HKG
Housekeeping Genes	Rpl32	ribosomal protein L32	O_gon2	379.692	HKG
Housekeeping Genes	Rpl12	ribosomal protein L12	O_gon2	162.544	HKG
